# Supplementary material
Source: PubMed Central journal article supplement (PMC4362518)

## Peter Hoffmann

---

**From:** Samantray, Banita (ELS-CHN) <b.samantray@reedelsevier.com>  
**Sent:** Tuesday, July 01, 2014 6:51 AM  
**To:** Peter Hoffmann  
**Subject:** RE: request for permission to reprint figure from JACC article

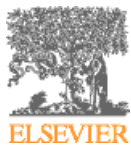

Dear Peter

Thank you for your permission request.

Please note that as one the Authors of this article, (Drs. M. Patel, S. Subherwal, and S. Jones) retain the right to prepare other derivative works, or to otherwise re-use portions or excerpts in other works, with full acknowledgement of its original publication in the journal.

For full details of their rights as a Journal Author, please visit:

<http://www.elsevier.com/wps/find/authorsview.authors/copyright#whatrights>

Please feel free to contact me if you have any queries.

Kind regards

Regards

**Banita Samantray**  
Global Rights Department

**Elsevier**  
(A division of Reed Elsevier India Pvt. Ltd.)

Ascendas International Tech Park | Crest Building – 12<sup>th</sup> Floor | Taramani Road | Taramani | Chennai 600 113 | India  
Tel: +91 44 42994667 | Fax: +91 44 42994701  
E-mail: [b.samantray@reedelsevier.com](mailto:b.samantray@reedelsevier.com) | url: [www.elsevier.com](http://www.elsevier.com)

---

**From:** Peter Hoffmann [mailto:peter.hoffmann@duke.edu]  
**Sent:** Tuesday, July 01, 2014 1:05 AM  
**To:** Health Permissions (ELS-PHI)  
**Cc:** Manesh Patel, M.D.; Sumeet Subherwal (ssubherwal@gmail.com)  
**Subject:** request for permission to reprint figure from JACC article

Dear Permissions Dept.,

I'm writing on behalf of the authors of a manuscript currently in submission (at revision stage) with *Circulation*; the authors would like permission to reprint Figure 1 (see image below) from the *Journal of the American College of Cardiology* article by Jones et al., 2012;60(21):2230-2236 ("Temporal Trends and Geographic Variation of Lower-Extremity Amputation in Patients With Peripheral

Artery Disease: Results From U.S. Medicare 2000–2008”) as a figure in their paper. Three of the coauthors for this new paper (Drs. M. Patel, S. Subherwal, and S. Jones) were among the coauthors of the *JACC* article.

Thank you for considering this request, and please let me know if you need any other information.

Best,  
Pete Hoffmann

-----  
Peter Hoffmann  
Senior Editor  
DCRI Communications  
Duke Clinical Research Institute  
300 W. Morgan Street, Suite 800  
Durham, NC 27701  
E-mail: [peter.hoffmann@duke.edu](mailto:peter.hoffmann@duke.edu)  
Phone: (919) 668-5933

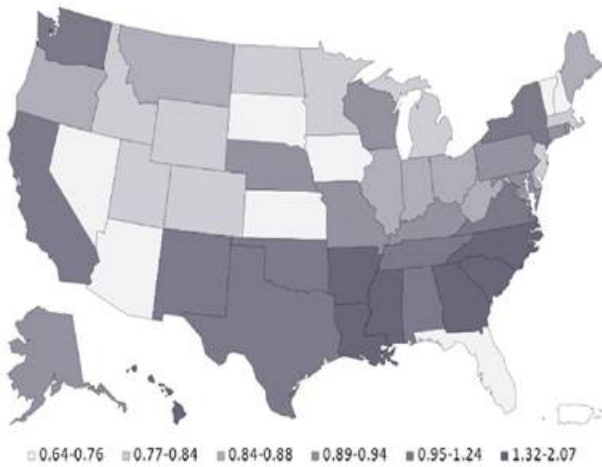

Supplement: NIHMS625775-supplement-figure_4_permissions.pdf [file NIHMS625775-supplement-figure_4_permissions.pdf]
