# Supplementary material
Source: PubMed Central journal article supplement (PMC4362518)
Supplement: NIHMS625775-supplement-supplemental_material.pdf [file NIHMS625775-supplement-supplemental_material.pdf]

# SUPPLEMENTAL MATERIAL

## Supplemental Methods

### **Subcategories of Peripheral Vascular Disease (PVD) Data Set**

Studies of primary and secondary prevention of vascular events were included if there was specific inclusion of patients with history of stroke, carotid disease, or lower extremity peripheral artery disease (PAD). Within the category of lower extremity PAD, given that critical limb ischemia (CLI) by definition includes ulceration or ischemic rest pain secondary to significant PAD, the subcategory of CLI trials included those trials that explicitly enrolled PAD patients with arterial ulceration or rest pain and investigated CLI treatment. Meanwhile, the arterial ulceration subcategory of lower extremity PAD studies included those studies that did not specifically define whether patients had flow-limiting PAD and those studies which specifically documented that patients had adequate arterial perfusion (such as therapies investigating treatment of diabetic foot ulcers). Studies enrolling patients with extra-cardiac vascular disease with the endpoints examining plaque regression, plaque stabilization, decrease in inflammatory biomarkers, improvements in endothelial function, and measurements of arterial vessel intimal medial thickness were categorized under the prevention of vascular events category. The subgroups of venous studies are described in Figure 1. Studies were allowed to be in more than 1 subgroup if they enrolled patients categorized within different subgroups (e.g., studies enrolling patients with both arterial and venous ulceration were included in both the arterial ulceration subgroup and venous ulceration subgroup). Venous ulcers were included if they were CEAP class 5 or above. Trials of therapies for pressure ulcers were excluded if they enrolled patients with only pressure ulcers but did not include patients with arterial or venous ulcers.

### **Development of Cardiology Data Set**

The cardiology subset was identified using the same method used to identify the PVD subset. Two Duke cardiologists reviewed a subset of the 2010 MeSH thesaurus and frequently occurring free-text condition terms for relevance to cardiovascular disease. An initial subset of 3503 studies were identified with at least 1 MeSH or condition term relevant to cardiovascular disease.

The cardiologists manually reviewed individual studies and their listed conditions to identify those related to cardiovascular disease in adult patients. They included only those that enrolled adults (maximum age  $\geq 18$  years) and studied conditions related to the diagnosis, treatment, or prevention of diseases of the heart (e.g., cardiovascular diseases, disorders of heart structure or function, or cardiovascular imaging). Conditions related to venous and pulmonary embolic disease; general risk factors such as diabetes, smoking, and hypertension in patients without coexisting cardiology disease; and other non-cardiology populations or conditions were excluded. Studies enrolling healthy volunteers were reviewed, and those that specified no cardiac

disease state were excluded. This left a final population of 2325 clinical studies. Those 248 studies that were also identified under the PVD data set were excluded from the cardiology data set (n=2077) for the analysis presented in this manuscript.

### **Derivation of Assumed Funding Source**

If the lead sponsor was from private industry, or the National Institutes of Health (NIH) was neither a lead sponsor nor collaborator and at least 1 collaborator was from industry, then the study was categorized as industry-funded. If the lead sponsor was not from industry, and the NIH was either a lead sponsor or a collaborator, then the study was categorized as NIH-funded. Otherwise, if the lead sponsor and collaborator fields were non-missing, then the study was considered to be funded by other sources.

## Supplemental Tables

Table 1. Characteristics of Arterial Disease Trials

|                                | Acute stroke     |                     | Renal<br>vascular<br>disease | Supra-aortic vascular disease |                       | Aortic           |                                  | Lower extremity peripheral artery disease |                                      |                               |                                | Primary and<br>secondary<br>prevention | Raynaud's<br>or<br>scleroderma |
|--------------------------------|------------------|---------------------|------------------------------|-------------------------------|-----------------------|------------------|----------------------------------|-------------------------------------------|--------------------------------------|-------------------------------|--------------------------------|----------------------------------------|--------------------------------|
|                                | Ischemic<br>N=77 | Hemorrhagic<br>N=46 | N=9                          | Intra-cranial<br>N=15         | Extra-cranial<br>N=18 | Thoracic<br>N=29 | Abdominal/<br>aortoiliac<br>N=39 | Intermittent<br>claudication<br>N=98      | Critical<br>limb<br>ischemia<br>N=91 | Acute limb<br>ischemia<br>N=3 | Arterial<br>ulceration<br>N=48 | N=82                                   | N=12                           |
| <b>Masking</b>                 |                  |                     |                              |                               |                       |                  |                                  |                                           |                                      |                               |                                |                                        |                                |
| Open                           | 28/76<br>(36.8%) | 20/46<br>(43.5%)    | 7/9 (77.8%)                  | 12/15<br>(80.0%)              | 13/16<br>(81.3%)      | 22/29<br>(75.9%) | 32/39<br>(82.1%)                 | 57/98<br>(58.2%)                          | 64/91<br>(70.3%)                     | 2/3 (66.7%)                   | 26/48<br>(54.2%)               | 20/82<br>(24.4%)                       | 4/12<br>(33.3%)                |
| Single blind                   | 6/76 (7.9%)      | 6/46 (13.0%)        | 0/9 (0.0%)                   | 0/15 (0.0%)                   | 2/16 (12.5%)          | 0/29 (0.0%)      | 3/39 (7.7%)                      | 21/98<br>(21.4%)                          | 10/91<br>(11.0%)                     | 0/3 (0.0%)                    | 4/48 (8.3%)                    | 9/82<br>(11.0%)                        | 0/12 (0.0%)                    |
| Double blind                   | 42/76<br>(55.3%) | 20/46<br>(43.5%)    | 2/9 (22.2%)                  | 3/15<br>(20.0%)               | 1/16 (6.3%)           | 7/29<br>(24.1%)  | 4/39 (10.3%)                     | 20/98<br>(20.4%)                          | 17/91<br>(18.7%)                     | 1/3 (33.3%)                   | 18/48<br>(37.5%)               | 53/82<br>(64.6%)                       | 8/12<br>(66.7%)                |
| <b>Allocation</b>              |                  |                     |                              |                               |                       |                  |                                  |                                           |                                      |                               |                                |                                        |                                |
| Randomized                     | 62/76<br>(81.6%) | 32/46<br>(69.6%)    | 7/9 (77.8%)                  | 8/15<br>(53.3%)               | 7/16 (43.8%)          | 9/29<br>(31.0%)  | 10/38<br>(26.3%)                 | 62/98<br>(63.3%)                          | 50/91<br>(54.9%)                     | 2/3 (66.7%)                   | 39/48<br>(81.3%)               | 77/82<br>(93.9%)                       | 8/12<br>(66.7%)                |
| Non-<br>randomized             | 14/76<br>(18.4%) | 14/46<br>(30.4%)    | 2/9 (22.2%)                  | 7/15<br>(46.7%)               | 9/16 (56.3%)          | 20/29<br>(69.0%) | 28/38<br>(73.7%)                 | 36/98<br>(36.7%)                          | 41/91<br>(45.1%)                     | 1/3 (33.3%)                   | 9/48<br>(18.8%)                | 5/82 (6.1%)                            | 4/12<br>(33.3%)                |
| <b>Intervention<br/>types*</b> |                  |                     |                              |                               |                       |                  |                                  |                                           |                                      |                               |                                |                                        |                                |
| Drug                           | 51/77<br>(66.2%) | 34/46<br>(73.9%)    | 4/9 (44.4%)                  | 3/15<br>(20.0%)               | 3/18 (16.7%)          | 9/29<br>(31.0%)  | 5/39 (12.8%)                     | 20/98<br>(20.4%)                          | 15/91<br>(16.5%)                     | 0/3 (0.0%)                    | 18/48<br>(37.5%)               | 68/82<br>(82.9%)                       | 11/12<br>(91.7%)               |
| Device                         | 13/77<br>(16.9%) | 4/46 (8.7%)         | 7/9 (77.8%)                  | 10/15<br>(66.7%)              | 12/18<br>(66.7%)      | 18/29<br>(62.1%) | 26/39<br>(66.7%)                 | 52/98<br>(53.1%)                          | 45/91<br>(49.5%)                     | 2/3 (66.7%)                   | 17/48<br>(35.4%)               | 3/82 (3.7%)                            | 1/12 (8.3%)                    |
| Procedure                      | 4/77 (5.2%)      | 6/46 (13.0%)        | 4/9 (44.4%)                  | 4/15<br>(26.7%)               | 6/18 (33.3%)          | 3/29<br>(10.3%)  | 10/39<br>(25.6%)                 | 18/98<br>(18.4%)                          | 18/91<br>(19.8%)                     | 1/3 (33.3%)                   | 11/48<br>(22.9%)               | 4/82 (4.9%)                            | 0/12 (0.0%)                    |
| Behavioral                     | 1/77 (1.3%)      | 0/46 (0.0%)         | 0/9 (0.0%)                   | 0/15 (0.0%)                   | 0/18 (0.0%)           | 0/29 (0.0%)      | 0/39 (0.0%)                      | 10/98<br>(10.2%)                          | 1/91 (1.1%)                          | 0/3 (0.0%)                    | 1/48 (2.1%)                    | 7/82 (8.5%)                            | 0/12 (0.0%)                    |
| Genetic or<br>biologic         | 7/77 (9.1%)      | 2/46 (4.3%)         | 0/9 (0.0%)                   | 0/15 (0.0%)                   | 0/18 (0.0%)           | 0/29 (0.0%)      | 0/39 (0.0%)                      | 2/98 (2.0%)                               | 15/91<br>(16.5%)                     | 0/3 (0.0%)                    | 3/48 (6.3%)                    | 1/82 (1.2%)                            | 0/12 (0.0%)                    |
| <b>Arm types†</b>              |                  |                     |                              |                               |                       |                  |                                  |                                           |                                      |                               |                                |                                        |                                |
| Active<br>comparator           | 25/68<br>(36.8%) | 15/43<br>(34.9%)    | 5/9 (55.6%)                  | 8/15<br>(53.3%)               | 8/16 (50.0%)          | 8/19<br>(42.1%)  | 9/28 (32.1%)                     | 39/82<br>(47.6%)                          | 29/79<br>(36.7%)                     | 2/3 (66.7%)                   | 20/42<br>(47.6%)               | 45/81<br>(55.6%)                       | 3/8 (37.5%)                    |
| No intervention<br>arm         | 9/68<br>(13.2%)  | 6/43 (14.0%)        | 0/9 (0.0%)                   | 1/15 (6.7%)                   | 0/16 (0.0%)           | 0/19 (0.0%)      | 2/28 (7.1%)                      | 6/82 (7.3%)                               | 7/79 (8.9%)                          | 0/3 (0.0%)                    | 3/42 (7.1%)                    | 4/81 (4.9%)                            | 0/8 (0.0%)                     |

|                         | Acute stroke     |                     | Renal<br>vascular<br>disease | Supra-aortic vascular disease |                       | Aortic           | Lower extremity peripheral artery disease |                                      |                                      |                               |                                | Primary and<br>secondary<br>prevention | Raynaud's<br>or<br>scleroderma |
|-------------------------|------------------|---------------------|------------------------------|-------------------------------|-----------------------|------------------|-------------------------------------------|--------------------------------------|--------------------------------------|-------------------------------|--------------------------------|----------------------------------------|--------------------------------|
|                         | Ischemic<br>N=77 | Hemorrhagic<br>N=46 | N=9                          | Intra-cranial<br>N=15         | Extra-cranial<br>N=18 | Thoracic<br>N=29 | Abdominal/<br>aortoiliac<br>N=39          | Intermittent<br>claudication<br>N=98 | Critical<br>limb<br>ischemia<br>N=91 | Acute limb<br>ischemia<br>N=3 | Arterial<br>ulceration<br>N=48 | N=82                                   | N=12                           |
| Enrollment <sup>‡</sup> |                  |                     |                              |                               |                       |                  |                                           |                                      |                                      |                               |                                |                                        |                                |
| Median                  | 119.5            | 60.0                | 120.0                        | 250.0                         | 281.0                 | 115.0            | 100.0                                     | 100.0                                | 80.0                                 | 250.0                         | 65.0                           | 185.0                                  | 45.5                           |
| (Q1,Q3)                 | (36.0,370.0)     | (24.0,184.0)        | (80.0,150.0)                 | (85.0,500.0)                  | (135.0,453.5)         | (50.0,250.0)     | (44.0,194.0)                              | (50.0,170.0)                         | (36.0,150.0)                         | (54.0,250.0)                  | (37.5,120.0)                   | (74.0,475.0)                           | (18.5,150.0)                   |

Data are n/N (%) except where indicated. Q1 indicates first quartile; Q3, third quartile.

\*A study may have more than 1 intervention type.

†A study may have more than 1 arm type.

‡Enrollment is either anticipated (for studies that had not completed enrollment on September 27, 2010) or actual.

Table 2. Characteristics of Venous Disease Trials

|                     | DVT treatment | DVT/PE prevention | Venous insufficiency | PE treatment  | Venous ulceration | Portal hypertension |
|---------------------|---------------|-------------------|----------------------|---------------|-------------------|---------------------|
|                     | N=27          | N=77              | N=19                 | N=19          | N=46              | N=2                 |
| Masking             |               |                   |                      |               |                   |                     |
| Open                | 17/26 (65.4%) | 43/76 (56.6%)     | 10/19 (52.6%)        | 7/19 (36.8%)  | 27/46 (58.7%)     | 1/2 (50.0%)         |
| Single blind        | 2/26 (7.7%)   | 5/76 (6.6%)       | 4/19 (21.1%)         | 4/19 (21.1%)  | 4/46 (8.7%)       | 1/2 (50.0%)         |
| Double blind        | 7/26 (26.9%)  | 28/76 (36.8%)     | 5/19 (26.3%)         | 8/19 (42.1%)  | 15/46 (32.6%)     | 0/2 (0.0%)          |
| Allocation          |               |                   |                      |               |                   |                     |
| Randomized          | 16/26 (61.5%) | 54/75 (72.0%)     | 17/19 (89.5%)        | 17/19 (89.5%) | 38/46 (82.6%)     | 2/2 (100.0%)        |
| Non-randomized      | 10/26 (38.5%) | 21/75 (28.0%)     | 2/19 (10.5%)         | 2/19 (10.5%)  | 8/46 (17.4%)      | 0/2 (0.0%)          |
| Intervention types* |               |                   |                      |               |                   |                     |
| Drug                | 19/27 (70.4%) | 63/77 (81.8%)     | 8/19 (42.1%)         | 18/19 (94.7%) | 12/46 (26.1%)     | 0/2 (0.0%)          |
| Device              | 4/27 (14.8%)  | 10/77 (13.0%)     | 4/19 (21.1%)         | 2/19 (10.5%)  | 23/46 (50.0%)     | 1/2 (50.0%)         |
| Procedure           | 0/27 (0.0%)   | 2/77 (2.6%)       | 6/19 (31.6%)         | 0/19 (0.0%)   | 5/46 (10.9%)      | 2/2 (100.0%)        |
| Behavioral          | 1/27 (3.7%)   | 0/77 (0.0%)       | 0/19 (0.0%)          | 0/19 (0.0%)   | 2/46 (4.3%)       | 0/2 (0.0%)          |
| Genetic or biologic | 0/27 (0.0%)   | 2/77 (2.6%)       | 0/19 (0.0%)          | 0/19 (0.0%)   | 2/46 (4.3%)       | 0/2 (0.0%)          |
| Arm types†          |               |                   |                      |               |                   |                     |
| Active comparator   | 11/23 (47.8%) | 41/73 (56.2%)     | 12/18 (66.7%)        | 12/17 (70.6%) | 20/39 (51.3%)     | 2/2 (100.0%)        |
| No intervention arm | 5/23 (21.7%)  | 11/73 (15.1%)     | 2/18 (11.1%)         | 0/17 (0.0%)   | 6/39 (15.4%)      | 0/2 (0.0%)          |
| Enrollment‡         |               |                   |                      |               |                   |                     |
| Median              | 289.5         | 300.0             | 180.0                | 129.0         | 62.0              | 141.5               |
| (Q1,Q3)             | (50.0,692.0)  | (100.0,669.0)     | (105.0,280.0)        | (41.0,1000)   | (25.0,200.0)      | (130.0,153.0)       |

Data are n/N (%) except where indicated. DVT indicates deep vein thrombosis; PE, pulmonary embolus; Q1, first quartile; Q3, third quartile.

\*A study may have more than 1 intervention type.

†A study may have more than 1 arm type.

‡Enrollment is either anticipated (for studies that had not completed enrollment on September 27, 2010) or actual.
